# Supplementary material for: Ultra-long Na2Ti3O7 nanowires@carbon cloth as a binder-free flexible electrode with a large capacity and long lifetime for sodium-ion batteries
Source: Royal Society of Chemistry journal article supplement (doi:10.1039/c6ta08416h), 2016-01-01
Supplement: c6ta08416h1.pdf [file c6ta08416h1.pdf]

**Editor's note:** A Correction was published on 16th November 2020 that affects Fig. S10 of this ESI. This can be viewed online at <https://doi.org/10.1039/D0TA90262D>.

## Supporting Information for

**“Ultra-long  $\text{Na}_2\text{Ti}_3\text{O}_7$  Nanowires@carbon Cloth as Binder-free Flexible  
Electrodes with a Large Capacity and Long Lifetime for Sodium-ion batteries”**

by

Zhihong Li, Wei Shen, Cong Wang, Qunjie Xu, Haimei Liu\*,

Yonggang Wang\*, Yongyao Xia

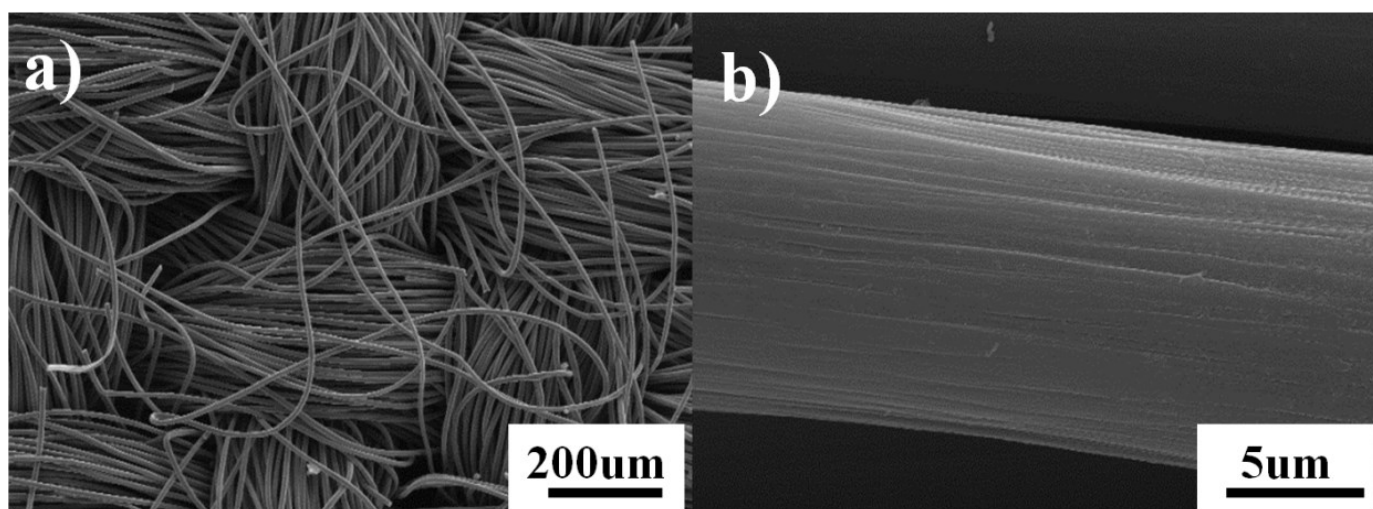

**Fig. S1.** a,b) SEM images of pre-treated carbon cloth.

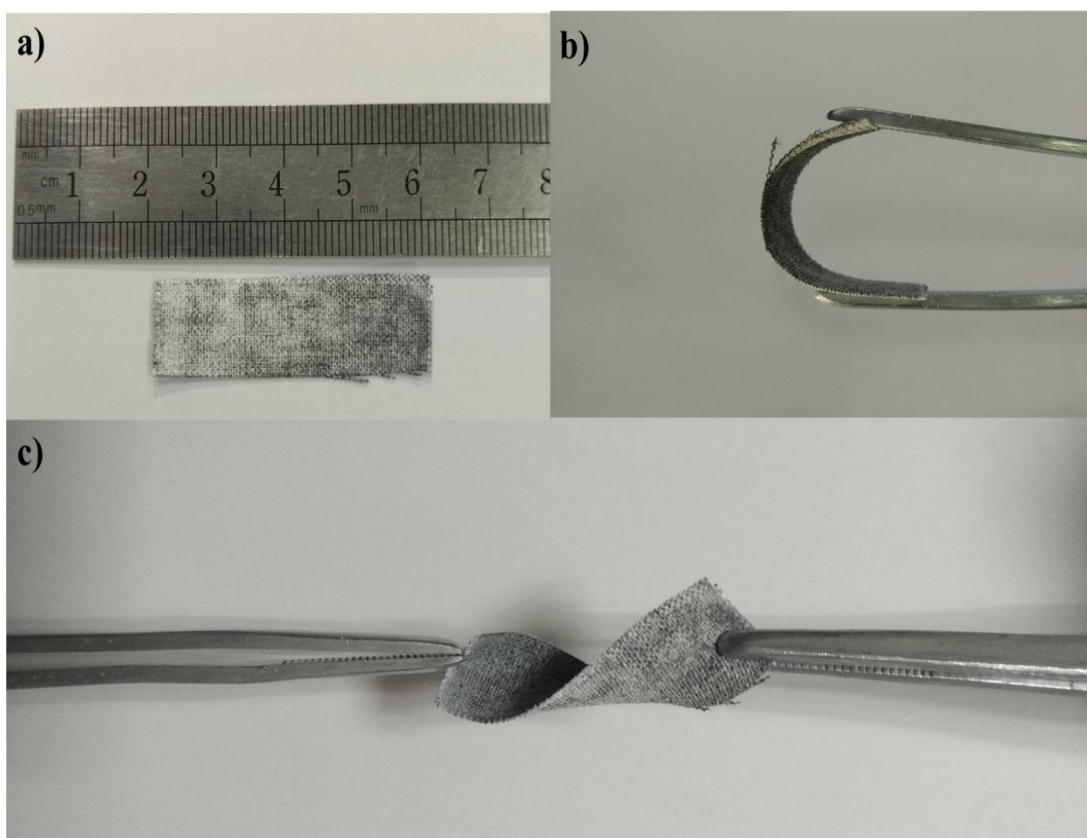

**Fig. S2.** Optical images of the flexible NTO nanowires@CC at a) normal, b) bending, and c) twisting states.

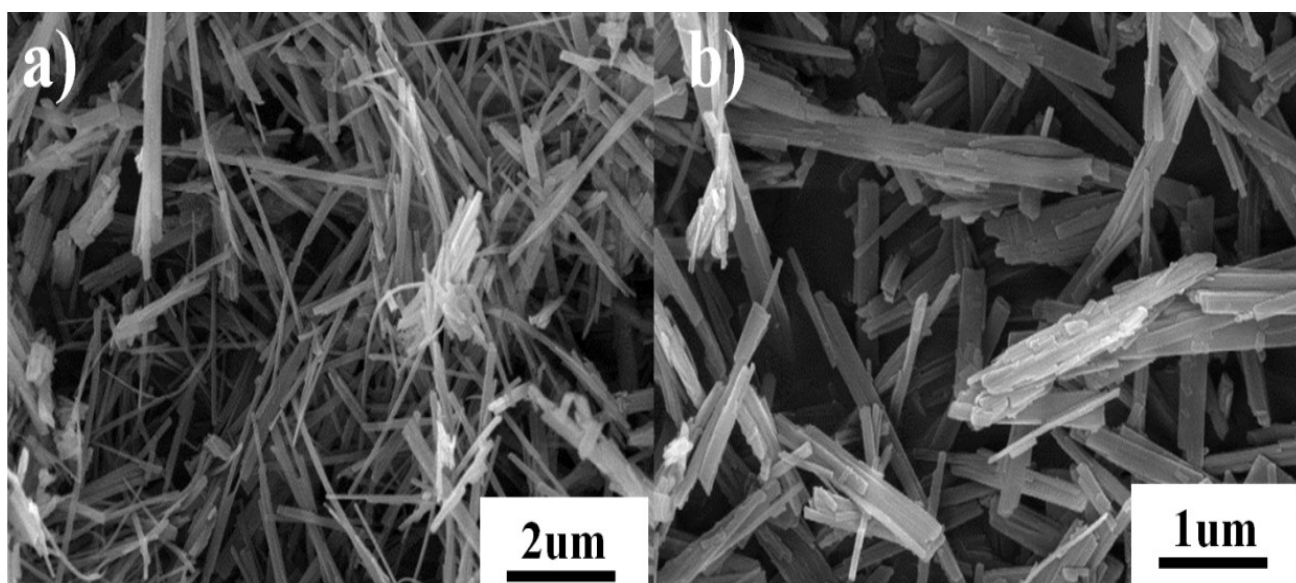

**Fig. S3.** a,b) SEM images of pure NTO nanorods formed without CC.

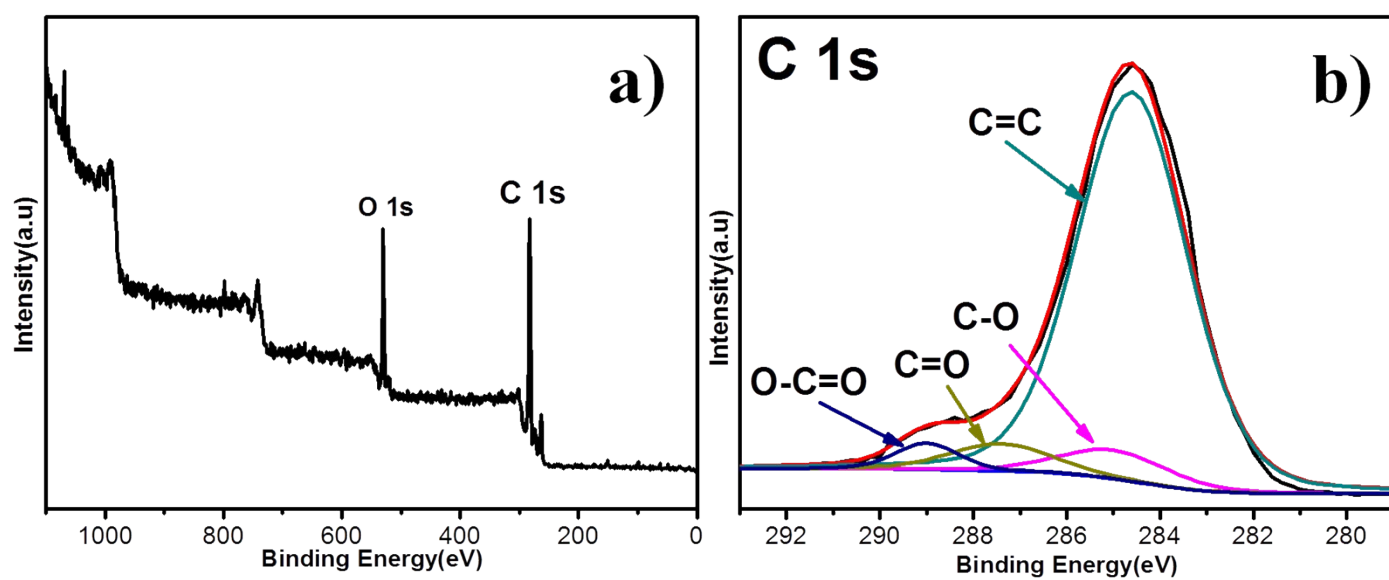

**Fig. S4.** a) XPS survey spectrum of pre-treated CC. High resolution XPS spectra of  
b) C 1s for pre-treated CC .

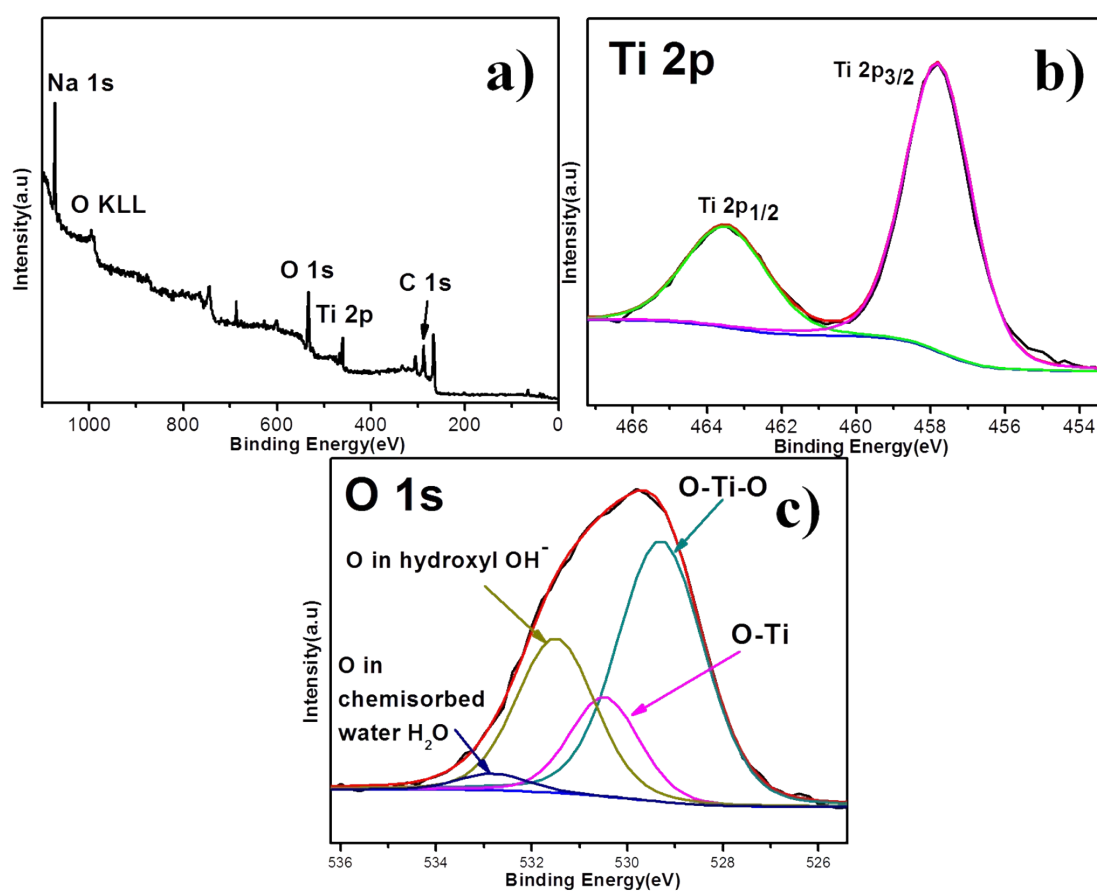

**Fig. S5.** a) XPS survey spectrum of pure NTO nanorods. High resolution XPS spectra of b) Ti 2p, and c) O 1s for pure NTO nanorods.

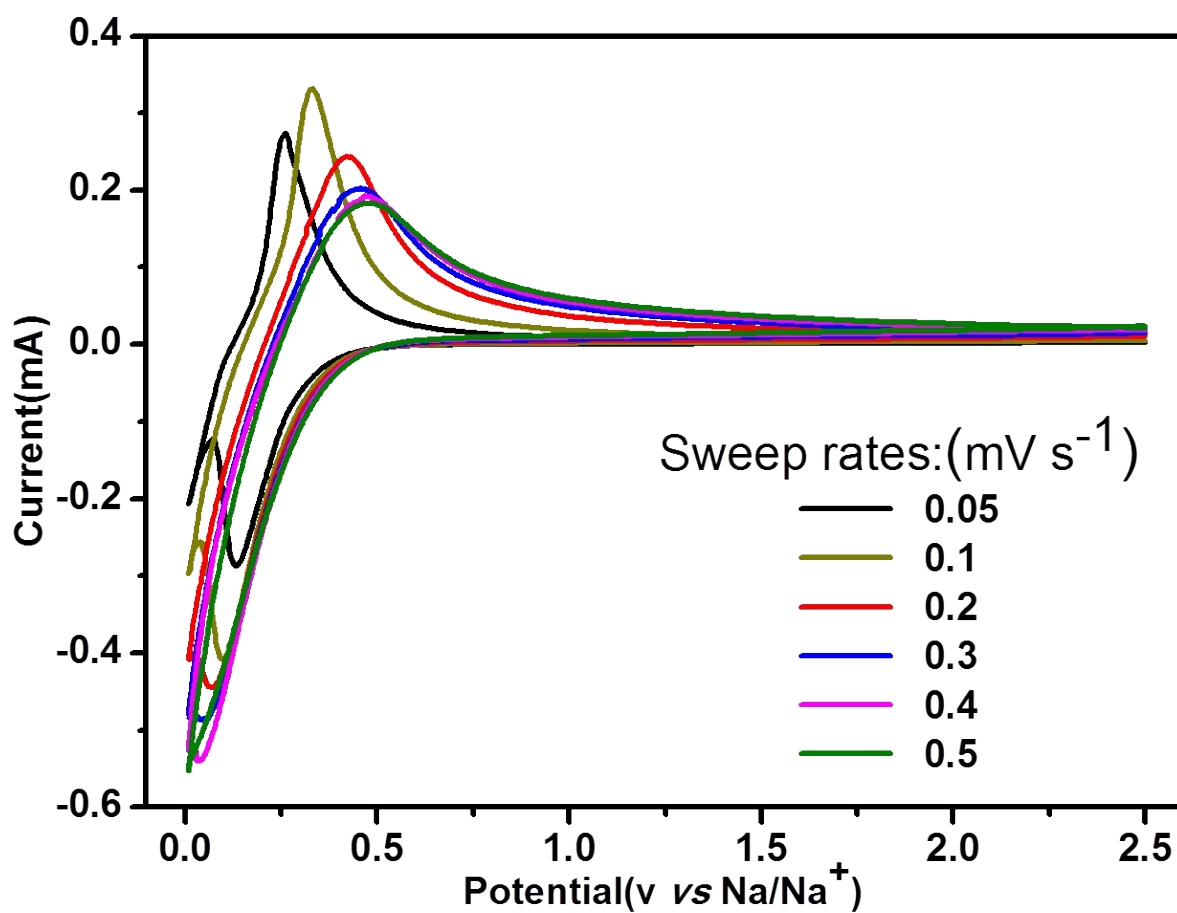

**Fig. S6.** CV curves of the NTO nanowires@CC electrodes at various sweep rates from 0.05 to 0.5 mV s<sup>-1</sup> in a voltage window of 0.01 to 2.5 V.

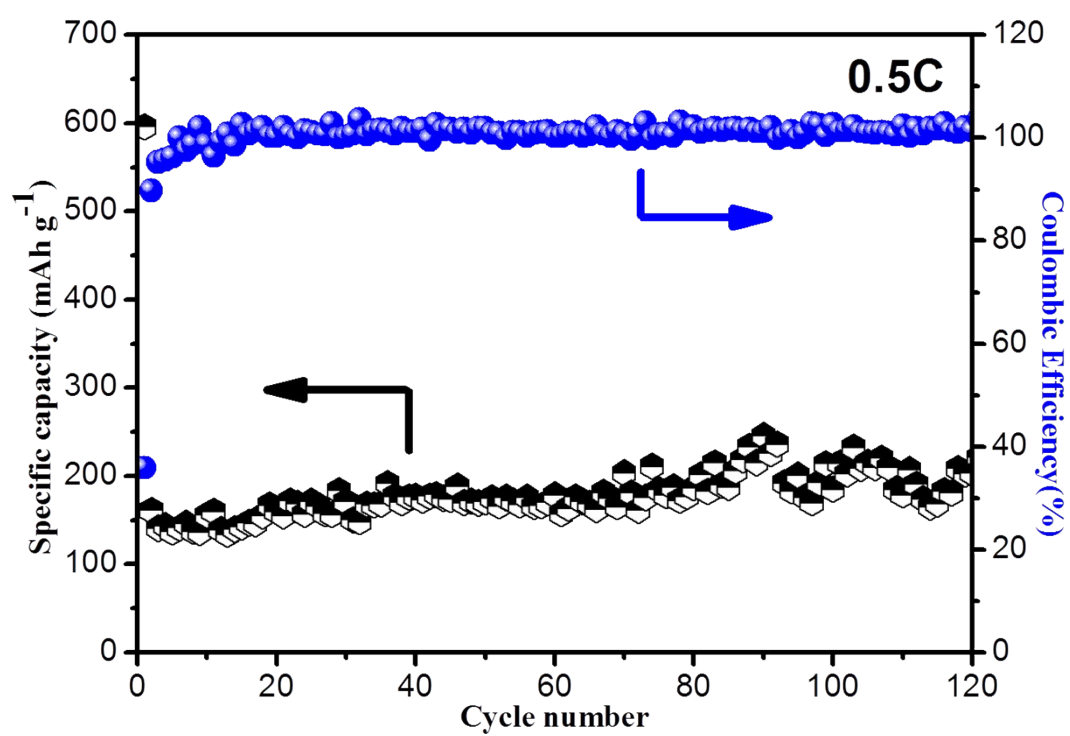

**Fig. S7.** Cycle performance of NTO nanowires@CC between 0.01 and 2.5 V at 0.5C

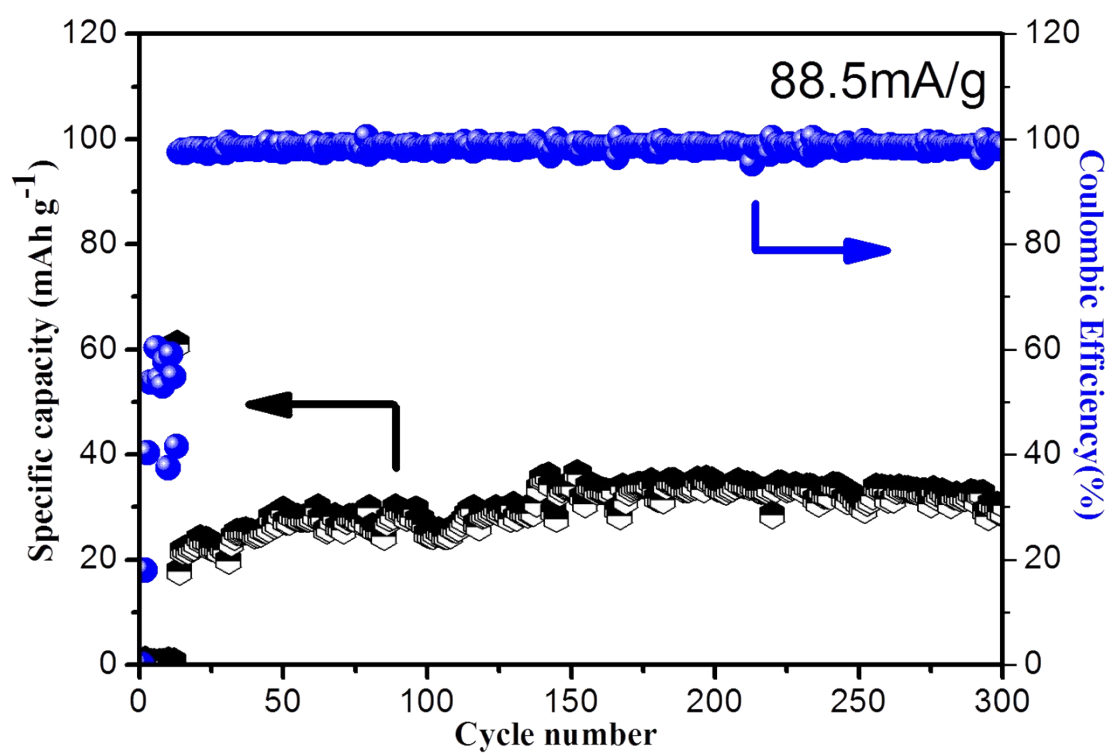

**Fig. S8.** Cycle performance of bare CC between 0.01 and 2.5 V at 88.5 mA  $\text{g}^{-1}$



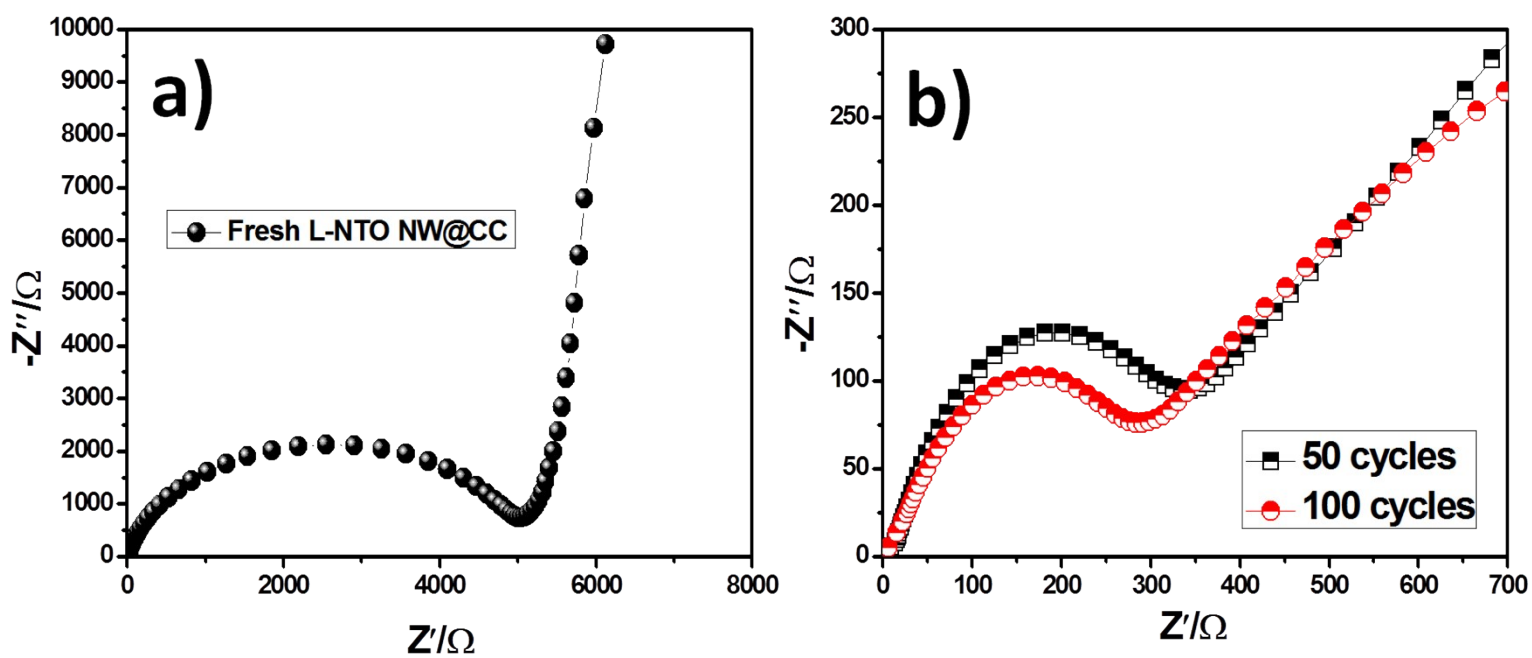

**Fig. S9.** Impedance spectra of the NTO nanowires@CC electrodes at stages of a) fresh stages and b) various cycling stages at 1C.

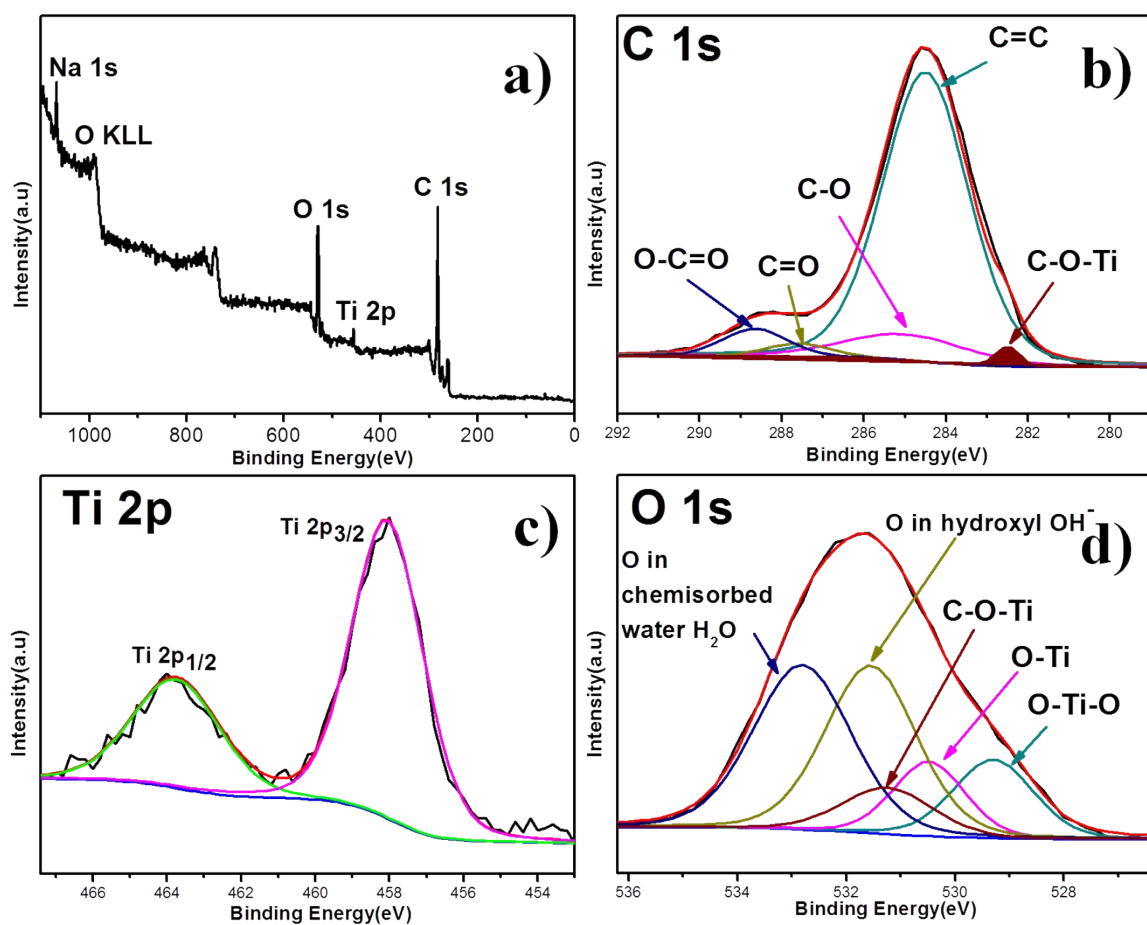

**Fig. S10.** a) XPS survey spectrum of NTO nanowires@CC after the cycles. High resolution XPS spectra of b) C 1s, c) Ti 2p, and d) O 1s for NTO nanowires@CC.

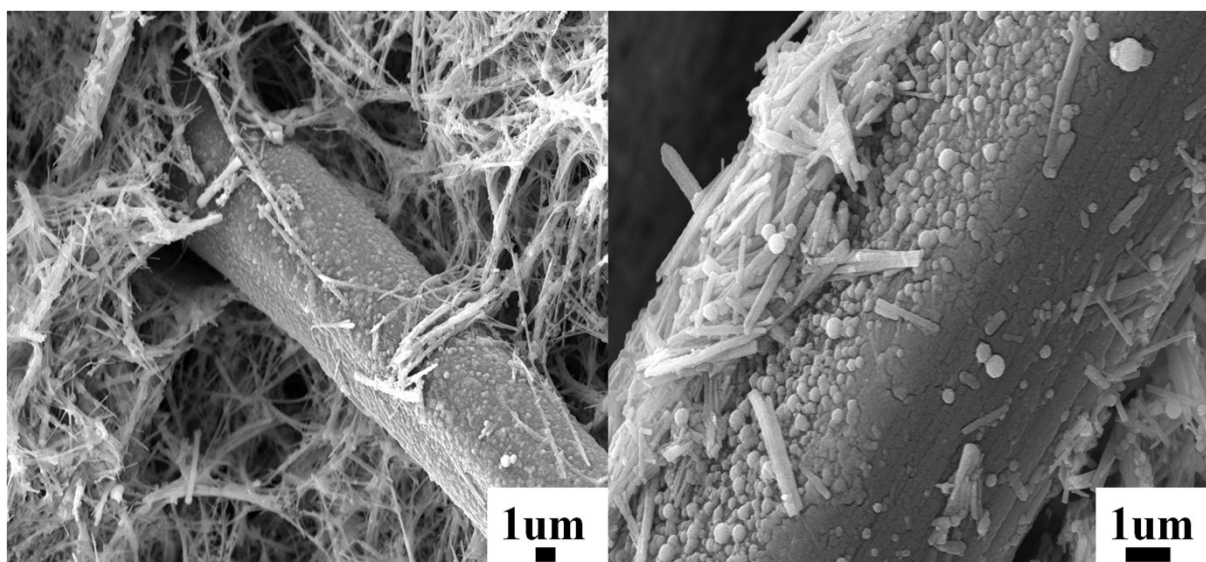

**Fig. S11.** a) SEM images of NTO nanowires@CC after the first cycle of discharge,  
b) after the first cycle of charge.

**Table S1.** Comparison of electrochemical performance of different NTO materials

| Electrode definition                                    | Specific capacity<br>(mAh g <sup>-1</sup> )                        | Cycle performance                                                                                    | Reference |
|---------------------------------------------------------|--------------------------------------------------------------------|------------------------------------------------------------------------------------------------------|-----------|
| L-NTO NW@CC                                             | 242.8 mAh g <sup>-1</sup> at 1C<br>191.5 mAh g <sup>-1</sup> at 2C | 211.9 mAh g <sup>-1</sup> after 300 cycles at 1C<br>183.8 mAh g <sup>-1</sup> after 300 cycles at 2C | This work |
| NTO nanoarrays                                          | 190 mAh g <sup>-1</sup> at 1C                                      | 195 mAh g <sup>-1</sup> after 200 cycles at 1C                                                       | 1         |
| NTO nanotube                                            | 186 mAh g <sup>-1</sup> at 1C                                      | 101 mAh g <sup>-1</sup> after 1200 cycles at 5C                                                      | 2         |
| 3D spider-web architecture assembled from NTO nanotubes | 200 mAh g <sup>-1</sup> at 200 mA g <sup>-1</sup>                  | 200 mAh g <sup>-1</sup> after 100 cycles at 400 mA g <sup>-1</sup>                                   | 3         |
| Miscrospheric NTO consisting of nanotubes               | 263 mAh g <sup>-1</sup> at 354 mA g <sup>-1</sup>                  | 108 mAh g <sup>-1</sup> after 100 cycles at 354 mA g <sup>-1</sup>                                   | 4         |
| NTO/C                                                   | 121.2 mAh g <sup>-1</sup> at 1C                                    | 111.8 mAh g <sup>-1</sup> after 100 cycles at 1C                                                     | 5         |
| NTO/CNT                                                 | 245 mAh g <sup>-1</sup> at 170 mA g <sup>-1</sup>                  | 200 mAh g <sup>-1</sup> after 200 cycles at 170 mA g <sup>-1</sup>                                   | 6         |

1. S. Fu, J. Ni, Y. Xu, Q. Zhang and L. Li, *Nano Lett.*, 2016, DOI: 10.1021/acs.nanolett.6b01805.
2. J. Ni, S. Fu, C. Wu, Y. Zhao, J. Maier, Y. Yu and L. Li, *Adv. Energy Mater.*, 2016, **6**, 1502568.
3. Y. Zhang, L. Guo and S. Yang, *Chem. Commun.*, 2014, **50**, 14029-14032.
4. W. Wang, C. Yu, Z. Lin, J. Hou, H. Zhu and S. Jiao, *Nanoscale*, 2013, **5**, 594-599.
5. Z. Yan, L. Liu, H. Shu, X. Yang, H. Wang, J. Tan, Q. Zhou, Z. Huang and X. Wang, *J. Power Sources*, 2015, **274**, 8-14.
6. S. Dong, L. Shen, H. Li, P. Nie, Y. Zhu, Q. Sheng and X. Zhang, *J. Mater. Chem. A*, 2015, **3**, 21277-21283.
